# Supplementary material for: A Novel Lamin A Mutant Responsible for Congenital Muscular Dystrophy Causes Distinct Abnormalities of the Cell Nucleus
Source: PubMed Central journal article supplement (PMC5268432; doi:10.1371/journal.pone.0169189), 2017-01-26
Supplement: pone.0169189.s001.pdf [file pone.0169189.s001.pdf]

Barateau et al.

**A novel lamin A mutant responsible for congenital muscular dystrophy causes distinct abnormalities of the cell nucleus**

| Organism              | Protein   | Sequence                                                           |
|-----------------------|-----------|--------------------------------------------------------------------|
|                       |           | Coil 2 $\longrightarrow$ $\longleftarrow$ Tail                     |
|                       |           | <b>R388</b>                                                        |
| Human                 | Lamin A/C | DEYKIHAYRKLLLEGE <del>EEERL</del> <b>RL</b> SPSPTSQRSRGRAS         |
| Rat                   | Lamin A/C | DEYKIHAYRKLLLEGE <del>EEERL</del> <b>RL</b> SPSPTSQRSRGRAS         |
| Mouse                 | Lamin A/C | DEYKIHAYRKLLLEGE <del>EEERL</del> <b>RL</b> SPSPTSQRSRGRAS         |
| Chicken               | Lamin A   | DEYKINAYRKLLLEGE <del>EEERL</del> <b>RL</b> SPSPSSQ <b>RGARSSG</b> |
| <i>Xenopus laevis</i> | Lamin A   | DEYKINAYRKLLLEGE <del>EEERL</del> <b>RL</b> SPSPNT <b>QKRSARTI</b> |

**S1 Fig. Amino acid sequences alignment for lamin A/C across different species.** The position of the mutation described in this study is shown in bold. The corresponding Swiss Prot accession numbers are P02545, P48679 and P48678 for human, rat and mouse lamin A/C, respectively, and P13648 and P11048 for chicken and *Xenopus laevis* lamin A, respectively.
