# Supplementary material for: A Novel Lamin A Mutant Responsible for Congenital Muscular Dystrophy Causes Distinct Abnormalities of the Cell Nucleus
Source: PubMed Central journal article supplement (PMC5268432; doi:10.1371/journal.pone.0169189), 2017-01-26
Supplement: pone.0169189.s002.pdf [file pone.0169189.s002.pdf]

**A novel lamin A mutant responsible for congenital muscular dystrophy causes distinct abnormalities of the cell nucleus**

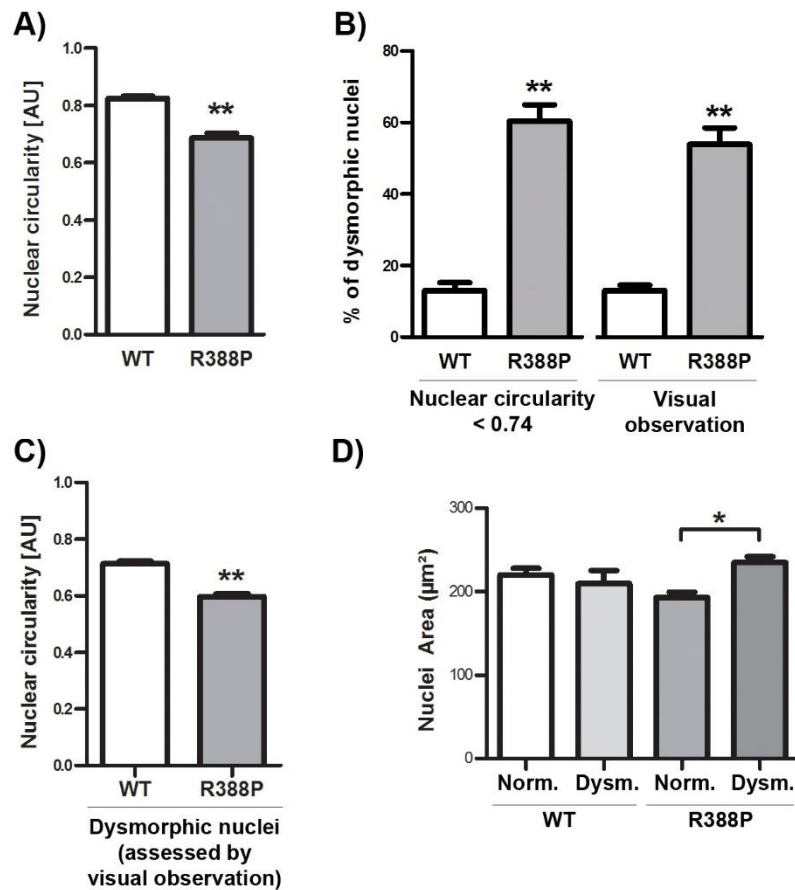

**S2 Fig. Characteristics of dysmorphic nuclei, in terms of circularity and surface area.** C2C12 cells overexpressing WT (WT) or mutant (R388P) FLAG-LA were fixed and labelled with anti-FLAG antibodies and analysed by immunofluorescence under confocal microscopy. **A)** Nuclear circularity (mean value  $\pm$  s.e.m.) of whole cell populations expressing either WT FLAG-LA or R388P FLAG-LA. \*\*  $p = 0.002$  for  $n = 6$  independent experiments (Mann Whitney test) **B)** Percentage (mean  $\pm$  s.e.m.) of dysmorphic nuclei among cells expressing either WT FLAG-LA or R388P FLAG-LA. The criteria of dysmorphism rely on the circularity value (inferior to 0.74) or on the visual observation, as indicated. \*\*  $p = 0.002$  for  $n = 6$  independent experiments (Mann Whitney test). **C)** Nuclear circularity (mean  $\pm$  s.e.m.) of dysmorphic nuclei as revealed by visual observation of cell populations expressing WT FLAG-LA or R388P FLAG-LA. \*\*  $p = 0.002$  for  $n = 6$  independent experiments (Mann Whitney test). **D)** Size of nuclei (mean expressed in  $\mu\text{m}^2 \pm$  s.e.m.) with either normal shape (Norm.) or with dysmorphism (Dysm.) as assessed by visual observation of cell populations

expressing either WT FLAG-LA or R388P FLAG-LA. \*  $p = 0.01$  for  $n = 6$  independent experiments (Kruskal-Wallis test with the pairwise comparison of groups).
