# Supplementary material for: A Novel Lamin A Mutant Responsible for Congenital Muscular Dystrophy Causes Distinct Abnormalities of the Cell Nucleus
Source: PubMed Central journal article supplement (PMC5268432; doi:10.1371/journal.pone.0169189), 2017-01-26
Supplement: pone.0169189.s003.pdf [file pone.0169189.s003.pdf]

**A novel lamin A mutant responsible for congenital muscular dystrophy causes distinct abnormalities of the cell nucleus**

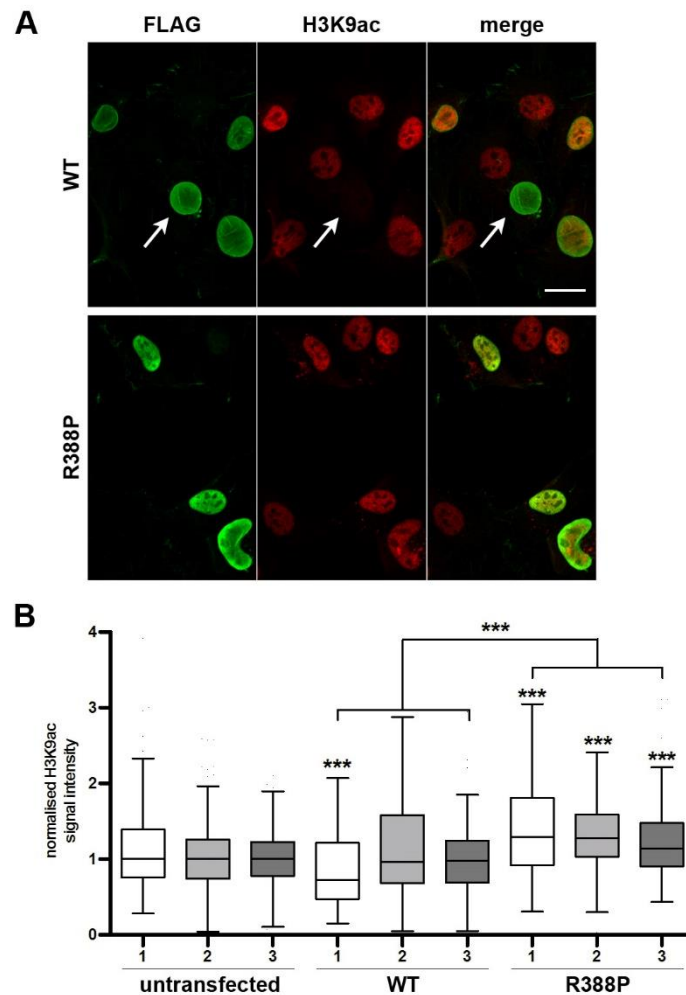

**S3 Fig. Increased H3K9ac acetylation detection in cells expressing R388P FLAG-LA.**

**A)** C2C12 cells overexpressing WT or R388P FLAG-LA were fixed and labelled with mouse anti-FLAG (green) and rabbit anti-H3K9ac (red) antibodies before observation under confocal microscopy. Arrows in **A)** indicate the absence of H3K9ac signal in cells overexpressing WT lamins A. Scale bar, 20  $\mu$ m. **B)** The graph illustrates the H3K9ac median immunofluorescence signal intensity observed per nucleus of cells processed as in **A)** that express either WT or R388P-LA. Signals are normalised to the signal measured in untransfected cells for 3 independent experiments (1, 2, 3). Boxes show first and third quartiles, bars are put according to Tukey method for  $n > 125$  nuclei per condition, \*\*\*  $p < 0.001$  (Mann Whitney test).
